# Supplementary material
Source: Springer Nature journal article supplement (https://www.springermedizin.de/resource/supplementary/12905_2011_285_MOESM1_ESM.pdf/9518346)

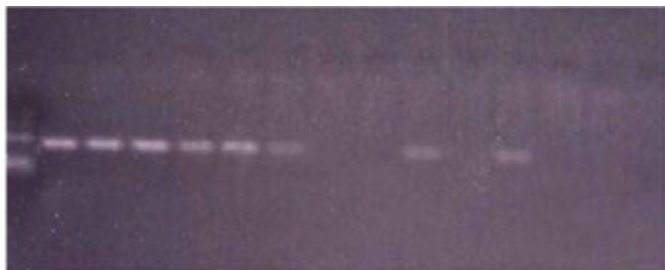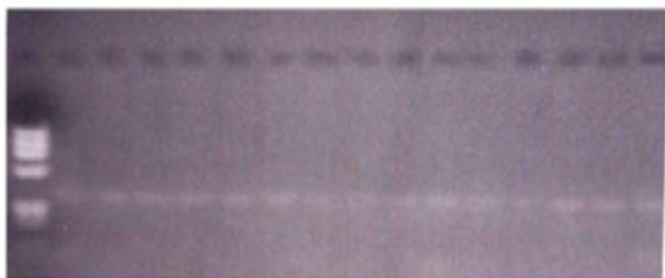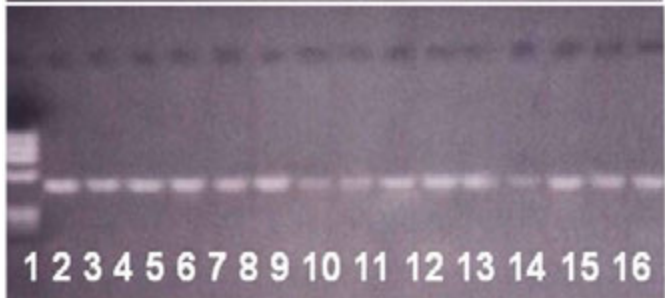

1 2 3 4 5 6 7 8 9 10 11 12 13 14 15 16

Supplement: MOESM1 [file 9518346]
